# Supplementary material
Source: HighWire-hosted journal article supplement (https://openheart.bmj.com/content/9/2/e002135)
Supplement: inline-supplementary-material-1 [file inline-supplementary-material-1.pdf]

## SUPPLEMENTAL MATERIAL

### Supplemental Methods

#### Data Sources and Study design

The study aimed to compare whether renin-angiotensin system inhibitor (RASi)-only or calcium channel blocker (CCB)-only was clinically more beneficial as initial antihypertensive therapy from the LIFE Study database comprising 14 municipality-level sources of claims data between 2016 and 2020. The time to treatment failure (TTF) was compared between RASi-only (n=707) and CCB-only (n=1,096) groups. To accurately assess whether RASi or CCB is more effective as a primary antihypertensive drug, patients receiving other antihypertensives were excluded (total, n=426; beta-blocker, n=190; alpha-blocker, n=95; thiazide, n=57; and mineralocorticoid-receptor antagonists, n=149; including duplication). In addition, patients taking both RASi and CCB were excluded (n=151). A total of 1,330 patients were eligible for the second evaluation ([Supplemental Figure 1](#)). Antihypertensive drugs were defined as those summarized in [Supplemental Table 1](#). The diagnostic criteria for hypertension were determined as registration of hypertension and administration of antihypertensive drugs. The date of diagnosis was determined as the first day of administration of antihypertensive drugs. As an indicator for clinical

outcomes, TTF, defined as the time between the first and last administration of VSP inhibitors, was used. Medical history was extracted according to the Elixhauser Comorbidity Index. (18)

### **Statistical analysis**

Statistical analysis was performed using the same protocol described in the main paper. The without-RASI group for the primary endpoint and the CCB-only for the secondary endpoint were set as references; the hazard ratio (HR) was described with a 95% confidence interval (CI).  $P < 0.05$  was considered statistically significant for all other statistical analyses. Statistical analyses were performed using Python, version 3.8.5 (Python Software Foundation, Beaverton, Oregon, USA).

### **Supplemental Results**

#### **Patient characteristics**

The LIFE Study database comprised 1,588,335 patients. In this study, 4,004 patients fulfilled the inclusion criteria. After excluding patients who received only one cycle of VSP inhibitors (n=426) and those who were not diagnosed with hypertension before or during VSP inhibitor therapy (n=1,196), a total of 2,380 patients with

hypertension were eligible. Among them, 1,954 patients treated with RASI and CCB were selected. After exclusion of patients treated with both RASI and CCB, a total of 1,803 patients were eligible: RASI-only (n=707) and CCB-only (n=1,096). The study design is shown in [Supplemental Figure 1](#). Patient characteristics and primary cancer lesions with associated VSP inhibitors are described in [Supplemental Tables 2 and 3](#).

#### **RASI-only vs. CCB-only for hypertension in patients treated with VSP inhibitors**

Median TTFs were 171 [63–396] days in the RASI-only group and 168 [69–389] days in the CCB-only group, and no significant difference was detected between groups ( $P=0.584$ , log-rank test; [Supplemental Figure 2](#)). In addition, there was no significant gap between groups using the unadjusted, adjusted Cox proportional hazard model, and inverse probability of treatment weighting (IPTW) model ([Supplemental Table 4](#)). Other propensity models were also unable to detect the clinical effects of RASIs.

Even in the patients who received VSP inhibitor treatment for more than 4 weeks, no significant difference in TTF was demonstrated between RASI-only and CCB-only groups: HR 0.93 [0.84–1.03] ( $P=0.143$ ) in the adjusted model with HR 0.92 [0.82–1.03] ( $P=0.131$ ) in the IPTW model ([Supplemental Table 4](#)). Similar results were

obtained in models restricted to the patients newly diagnosed with hypertension after VSP inhibitor administration. Besides, no subgroup revealed a significant favourable clinical impact of RASI-only treatment ([Supplemental Table 5](#)).

**Supplemental Table 1. Definition of Antihypertensive drugs**

| <b>Renin-angiotensin system inhibitors</b>      | <b>Beta blockers*</b>                         |
|-------------------------------------------------|-----------------------------------------------|
| <b>Angiotensin-converting enzyme inhibitors</b> | Acebutolol hydrochloride                      |
| Alacepril                                       | Amosulalol hydrochloride                      |
| benazepril hydrochloride                        | Arotinolol hydrochloride                      |
| Captopril                                       | Atenolol                                      |
| Cilazapril hydrate                              | Betaxolol hydrochloride                       |
| Delapril hydrochloride                          | Bevantolol hydrochloride                      |
| Enalapril maleate                               | Bisoprolol fumarate                           |
| Imidapril hydrochloride                         | Carteolol hydrochloride                       |
| Lisinopril hydrate                              | Carvedilol                                    |
| Temocapril hydrochloride                        | Nipradilol                                    |
| Trandolapril                                    | Pindolol                                      |
| Perindopril erbumine                            | Propranolol hydrochloride                     |
| Quinapril hydrochloride                         |                                               |
| <b>Angiotensin-II receptor blockers</b>         | <b>Mineralocorticoid receptor antagonists</b> |
| Azilsartan                                      | Eplerenone                                    |
| candesartan cilexetil                           | Spirolactone                                  |
| Irbesartan                                      | Triamterene                                   |
| Telmisartan                                     |                                               |
| losartan potassium                              | <b>Thiazide</b>                               |
| Olmesartan medoxomil                            | Benzylhydrochlorothiazide                     |
| Valsartan                                       | Hydrochlorothiazide                           |
|                                                 | Indapamide                                    |
| <b>Calcium channel blockers</b>                 | Mefruside                                     |
| Amlodipine besylate                             | Trichlormethiazide                            |
| Aranidipine                                     | Tripamide                                     |
| Barnidipine hydrochloride                       |                                               |
| Benidipine hydrochloride                        |                                               |
| Cilnidipine                                     |                                               |
| Efonidipine hydrochloride ethanolate            |                                               |
| Felodipine                                      |                                               |
| Manidipine hydrochloride                        |                                               |
| Nicardipine hydrochloride                       |                                               |
| Nifedipine                                      |                                               |
| Nisoldipine                                     |                                               |
| Nitrendipine                                    |                                               |
| Nilvadipine                                     |                                               |
| <b>Alpha blockers</b>                           |                                               |
| Bunazosin hydrochloride                         |                                               |
| Doxazosin mesylate                              |                                               |
| Prazosin hydrochloride                          |                                               |
| Terazosin hydrochloride hydrate                 |                                               |
| Urapidil                                        |                                               |

\* Including alpha and beta blockers

**Supplemental Table 2. Patient characteristics of RAS-only and CCB-only groups**

|                               | Total<br>(n = 1,803) | RASI-only<br>(n = 707) | CCB-only<br>(n = 1,096) | P value |
|-------------------------------|----------------------|------------------------|-------------------------|---------|
| Age                           | 74 [68–78]           | 74 [68–78]             | 74 [68–78]              | 0.959   |
| Age                           |                      |                        |                         | 0.357   |
| < 50 years old                | 24 (1.3%)            | 6 (0.8%)               | 18 (1.6%)               |         |
| 50-70 years old               | 527 (29.2%)          | 208 (29.4%)            | 319 (29.1%)             |         |
| ≥ 70years old                 | 1,252 (69.4%)        | 493 (69.7%)            | 759 (69.3%)             |         |
| Male                          | 1,087 (60.2%)        | 435 (61.5%)            | 652 (59.5%)             | 0.388   |
| Timing of hypertension onset  |                      |                        |                         | 0.170   |
| Pre-existing                  | 1,330 (73.8%)        | 509 (72.0%)            | 821 (74.9%)             |         |
| New-onset                     | 473 (26.2%)          | 198 (28.0%)            | 275 (25.1%)             |         |
| Cancer site                   |                      |                        |                         | 0.212   |
| Colorectal                    | 793 (44.0%)          | 292 (41.3%)            | 501 (45.7%)             |         |
| Stomach                       | 259 (14.4%)          | 113 (16.0%)            | 146 (13.3%)             |         |
| Liver                         | 432 (24.0%)          | 171 (24.2%)            | 261 (23.8%)             |         |
| Lung                          | 319 (17.7%)          | 131 (18.5%)            | 188 (17.2%)             |         |
| VSP Inhibitors                |                      |                        |                         | 0.187   |
| Ramucirumab                   | 358 (19.9%)          | 149 (21.1%)            | 209 (19.1%)             |         |
| Bevacizumab                   | 1,162 (64.4%)        | 453 (64.1%)            | 709 (64.7%)             |         |
| Lenvatinib                    | 136 (7.5%)           | 58 (8.2%)              | 78 (7.1%)               |         |
| Sorafenib                     | 147 (8.2%)           | 47 (6.6%)              | 100 (9.1%)              |         |
| Past medical history          |                      |                        |                         |         |
| Chronic pulmonary disease     | 766 (42.5%)          | 297 (42.0%)            | 469 (42.8%)             | 0.742   |
| Psychoses                     | 222 (12.3%)          | 89 (12.6%)             | 133 (12.1%)             | 0.775   |
| CHF                           | 488 (27.1%)          | 193 (27.3%)            | 295 (26.9%)             | 0.858   |
| Valvular disease              | 232 (12.9%)          | 96 (13.6%)             | 136 (12.4%)             | 0.469   |
| Cardiac arrhythmias           | 323 (17.9%)          | 121 (17.1%)            | 202 (18.4%)             | 0.477   |
| Depression                    | 295 (16.4%)          | 119 (16.8%)            | 176 (16.1%)             | 0.665   |
| Diabetes                      | 514 (28.5%)          | 209 (29.6%)            | 305 (27.8%)             | 0.426   |
| Renal failure                 | 180 (10.0%)          | 72 (10.2%)             | 108 (9.9%)              | 0.820   |
| Peripheral vascular disorders | 281 (15.6%)          | 122 (17.3%)            | 159 (14.5%)             | 0.116   |
| Hypothyroidism                | 173 (9.6%)           | 66 (9.3%)              | 107 (9.8%)              | 0.763   |
| Liver disease                 | 975 (54.1%)          | 386 (54.6%)            | 589 (53.7%)             | 0.722   |

CCB: Calcium channel blocker, CHF: congestive heart failure, RASI: renin-angiotensin system inhibitors, VSP: vascular endothelial growth factor signalling pathway

**Supplemental Table 3. Combination of primary cancer lesions and VSP inhibitors**

|                           |             | With-RASI vs. Without-RASI |         |       |      |       | RASI-only vs. CCB-only |         |       |      |       |
|---------------------------|-------------|----------------------------|---------|-------|------|-------|------------------------|---------|-------|------|-------|
|                           |             | Primary cancer site        |         |       |      | Total | Primary cancer site    |         |       |      | Total |
|                           |             | Colorectal                 | Gastric | Liver | Lung |       | Colorectal             | Gastric | Liver | Lung |       |
| Type of<br>VSP inhibitors | Ramucirumab | 38                         | 353     | 19    | 74   | 484   | 29                     | 259     | 12    | 58   | 358   |
|                           | Bevacizumab | 966                        | 0       | 174   | 341  | 1,481 | 764                    | 0       | 137   | 261  | 1,162 |
|                           | Lenvatinib  | 0                          | 0       | 197   | 0    | 197   | 0                      | 0       | 136   | 0    | 136   |
|                           | Sorafenib   | 0                          | 0       | 218   | 0    | 218   | 0                      | 0       | 147   | 0    | 147   |
| Total                     |             | 1,004                      | 353     | 608   | 415  | 2,380 | 793                    | 259     | 432   | 319  | 1,803 |

CRC: colorectal cancer, HCC: Hepatocellular carcinoma, RCC: Renal cell carcinoma, VSP: vascular endothelial growth factor signalling pathway

**Supplemental Table 4. TTF analyses between RASI-only and CCB-only groups**

| Analysis Models                                                                     | Sample size |          | HR [95% CI]      | P value |
|-------------------------------------------------------------------------------------|-------------|----------|------------------|---------|
|                                                                                     | RASI-only   | CCB-only |                  |         |
| <b>All patients</b>                                                                 |             |          |                  |         |
| Unadjusted analysis                                                                 | 707         | 1,096    | 0.97 [0.89–1.07] | 0.580   |
| Multivariate analysis*                                                              | 707         | 1,096    | 0.95 [0.86–1.05] | 0.289   |
| Propensity score-adjusted model                                                     |             |          |                  |         |
| IPTW                                                                                | 707         | 1,086    | 0.94 [0.85–1.05] | 0.265   |
| Regression adjustment                                                               | 707         | 1,086    | 0.94 [0.85–1.04] | 0.260   |
| Matching 1:1                                                                        | 697         | 697      | 0.96 [0.85–1.07] | 0.437   |
| Stratification                                                                      | 707         | 1,086    | 0.94 [0.85–1.04] | 0.250   |
| Within-propensity score quintile                                                    |             |          |                  |         |
| 1 (Lowest propensity score)                                                         | 119         | 240      | 0.96 [0.76–1.22] | 0.731   |
| 2                                                                                   | 130         | 228      | 0.87 [0.68–1.10] | 0.241   |
| 3                                                                                   | 145         | 214      | 1.08 [0.86–1.35] | 0.527   |
| 4                                                                                   | 143         | 215      | 1.00 [0.80–1.27] | 0.968   |
| 5 (Highest propensity score)                                                        | 170         | 189      | 0.82 [0.65–1.03] | 0.088   |
| <b>Patients who were treated for &gt; 4 weeks with VSP inhibitor administrated</b>  |             |          |                  |         |
| Unadjusted analysis                                                                 | 642         | 1,012    | 0.95 [0.86–1.05] | 0.358   |
| Multivariate analysis*                                                              | 642         | 1,012    | 0.93 [0.84–1.03] | 0.143   |
| Propensity score-adjusted model (IPTW)                                              | 642         | 1,005    | 0.92 [0.82–1.03] | 0.131   |
| <b>Patients with <i>de-novo</i> hypertension after VSP inhibitor administration</b> |             |          |                  |         |
| Unadjusted analysis                                                                 | 198         | 275      | 0.99 [0.83–1.19] | 0.942   |
| Multivariate analysis*                                                              | 198         | 275      | 0.93 [0.77–1.12] | 0.428   |
| Propensity score-adjusted model (IPTW)                                              | 197         | 265      | 0.87 [0.71–1.07] | 0.188   |

CCB: Calcium channel blocker, IPTW: Inverse probability of treatment weighting, RASI: renin-angiotensin system inhibitors, TTF: time to treatment failure, VSP: vascular endothelial growth factor signalling pathway

\* Adjusting age, sex, primary cancer lesion, type of VSP inhibitors, and past medical histories



**Supplemental Table 5. TTF and unadjusted analysis among RASI-only and CCB-only**

|                                     | TTF [IQR] (days) |               | HR [95% CI]      |
|-------------------------------------|------------------|---------------|------------------|
|                                     | RASI-only        | CCB-only      |                  |
| <b>Treatment</b>                    |                  |               |                  |
| non RASI group                      | -                | 168 [69–389]  | -                |
| RASI group                          | 171 [63–396]     | -             | -                |
| <b>Age</b>                          |                  |               |                  |
| < 50 years old                      | 356 [239–665]    | 164 [110–547] | 0.87 [0.33–2.25] |
| 50–70 years old                     | 250 [91–547]     | 187 [80–468]  | 0.86 [0.72–1.02] |
| ≥ 70 years old                      | 146 [57–349]     | 154 [63–364]  | 1.03 [0.92–1.15] |
| <b>Sex</b>                          |                  |               |                  |
| Female                              | 220 [84–469]     | 168 [70–389]  | 0.89 [0.76–1.03] |
| Male                                | 146 [60–366]     | 168 [66–387]  | 1.04 [0.92–1.17] |
| <b>Timing of hypertension onset</b> |                  |               |                  |
| Pre-existing                        | 127 [53–331]     | 147 [57–309]  | 1.00 [0.89–1.11] |
| New-onset                           | 321 [143–594]    | 308 [126–562] | 0.99 [0.83–1.19] |
| <b>Cancer site</b>                  |                  |               |                  |
| Colorectal                          | 260 [91–546]     | 245 [107–518] | 0.96 [0.83–1.11] |
| Stomach                             | 83 [42–169]      | 80 [42–161]   | 0.90 [0.71–1.16] |
| Liver                               | 149 [56–346]     | 133 [49–329]  | 0.93 [0.76–1.12] |
| Lung                                | 175 [81–367]     | 152 [75–284]  | 0.93 [0.74–1.16] |
| <b>VSP Inhibitors</b>               |                  |               |                  |
| Ramucirumab                         | 78 [42–168]      | 100 [42–180]  | 0.99 [0.80–1.23] |
| Bevacizumab                         | 252 [98–525]     | 229 [103–490] | 0.95 [0.84–1.07] |
| Lenvatinib                          | 109 [38–234]     | 112 [47–288]  | 1.14 [0.81–1.61] |
| Sorafenib                           | 96 [36–250]      | 78 [32–272]   | 0.93 [0.65–1.32] |
| <b>Past medical history</b>         |                  |               |                  |
| Chronic pulmonary disease           | 146 [58–384]     | 183 [84–448]  | 1.10 [0.95–1.27] |
| Psychoses                           | 186 [63–434]     | 196 [84–363]  | 0.98 [0.75–1.28] |
| CHF                                 | 156 [56–380]     | 161 [58–388]  | 1.02 [0.85–1.23] |
| Valvular disease                    | 156 [56–380]     | 161 [58–388]  | 1.02 [0.79–1.33] |
| Cardiac arrhythmias                 | 158 [63–359]     | 147 [63–324]  | 1.08 [0.86–1.35] |
| Depression                          | 182 [61–415]     | 169 [68–371]  | 0.92 [0.72–1.16] |
| Diabetes                            | 150 [61–371]     | 147 [62–350]  | 1.03 [0.86–1.23] |
| Renal failure                       | 151 [58–425]     | 128 [49–322]  | 0.94 [0.69–1.27] |
| Peripheral vascular disorders       | 132 [49–301]     | 132 [58–300]  | 1.01 [0.80–1.28] |
| Hypothyroidism                      | 145 [56–319]     | 154 [61–344]  | 1.05 [0.77–1.44] |
| Liver disease                       | 148 [63–364]     | 168 [63–378]  | 1.03 [0.91–1.17] |

CCB: Calcium channel blocker, CHF: congestive heart failure, CRC: colorectal cancer, HCC: Hepatocellular carcinoma, RASI: renin-angiotensin system inhibitors, TTF: time to treatment failure, VSP: vascular endothelial growth factor signalling pathway

## Figure and Figure Legends

### Supplemental Figure 1. Patient selection from the LIFE Study database

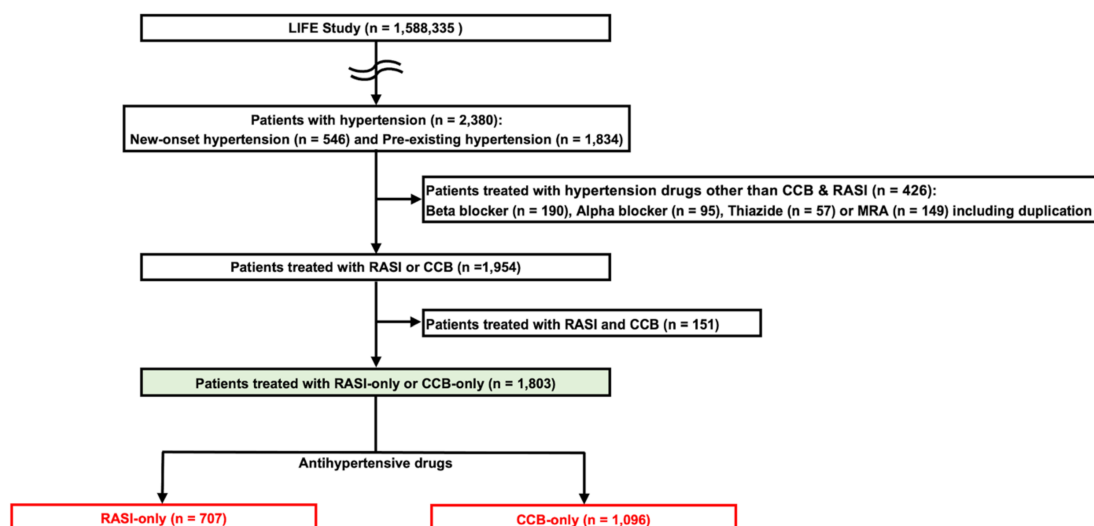

The LIFE Study database comprised 1,588,335 patients. In this study, 4,004 patients fulfilled the inclusion criteria (see method section). After excluding patients who received only one cycle of VSP inhibitors (n=426) and those who were not diagnosed with hypertension before or during VSP inhibitor therapy (n=1,198), a total of 2,380 patients with hypertension were eligible. Among them, 1,954 patients treated with RASI and CCB were selected. After the exclusion of 151 patients treated with both RASI and CCB, a total of 1,803 patients were finally eligible: RASI-only (n=707) and CCB-only (n=1,096).

CCB: calcium channel blocker, MRA: mineralocorticoid receptor antagonists, RASI: renin-angiotensin system inhibitors.

**Supplemental Figure 2. Comparison of TTF between RASI-only and CCB-only groups**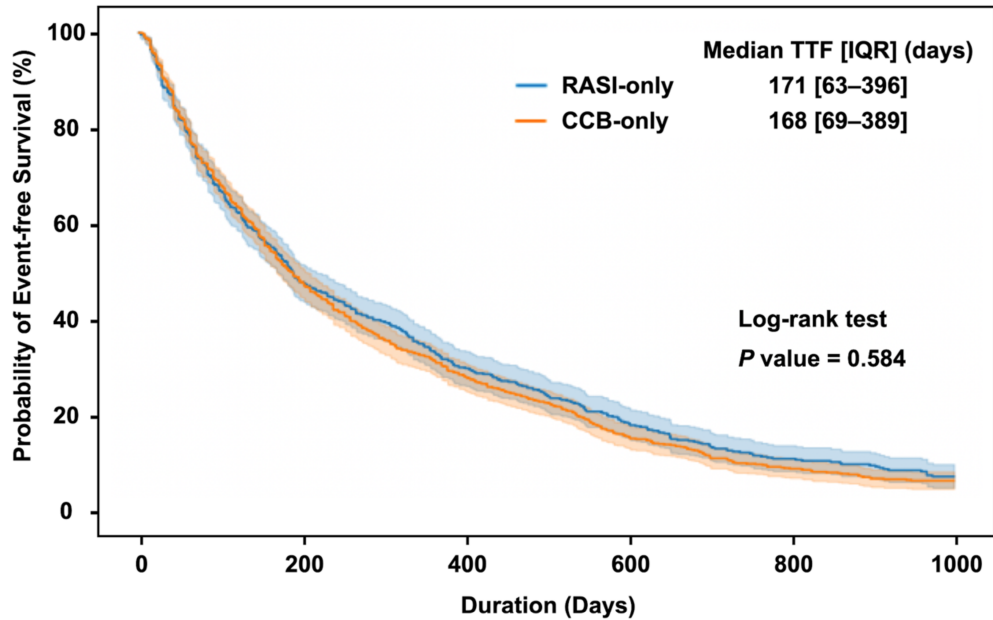**Number at risk**

|           |       |     |     |     |    |    |
|-----------|-------|-----|-----|-----|----|----|
| RASI-only | 707   | 311 | 176 | 98  | 50 | 29 |
| CCB-only  | 1,096 | 481 | 265 | 133 | 73 | 46 |

Kaplan–Meier curve showing TTF between groups. Median TTFs in the RASI-only (171 [63–396] days) and the CCB-only (168 [69–389] days) groups were equivalent (log-rank  $P=0.584$ ). CCB: calcium channel blocker, RASI: renin-angiotensin system inhibitors, IQR: interquartile range, TTF: time to treatment failure
